# Supplementary material for: β-Cyclodextrin catalysed synthesis of tryptanthrin in water
Source: Royal Society of Chemistry journal article supplement (doi:10.1039/c0gc00523a), 2010-12-02

# **$\beta$ -Cyclodextrin catalysed synthesis of tryptanthrin in water**

**Atul Kumar,\* Vishwa Deepak Tripathi, and Promod Kumar**

Medicinal and Process Chemistry Division,  
Central Drug Research Institute, CSIR, Lucknow India

## **Supplementary Data**

### **Contents**

|                                                             |   |
|-------------------------------------------------------------|---|
| 1. General Consideration.....                               | 1 |
| 2. General Procedure for synthesis of compounds 3(a-x)..... | 1 |
| 3. Catalyst recovery procedure.....                         | 1 |
| 4. Analytical data.....                                     | 1 |
| 5. <sup>1</sup> H and <sup>13</sup> C NMR spectra.....      | 6 |

**General consideration:** All the reactions were carried out at room temperature that is 28-32<sup>o</sup>C. Unless otherwise specified, all the reagents were purchased from Sigma-Aldrich Chemical Co, Lancaster and were used directly without further any purification. NMR spectra were obtained using the Bruker DRX 300MHz spectrometer. Chemical shifts ( $\delta$ ) are given in ppm relative to TMS, coupling constants ( $J$ ) in Hz. IR spectra were taken on VARIAN FT-IR spectrometer as KBr pellets (when solid). Elemental analysis was performed using a Perkin Elmer Autosystem XL Analyzer. Melting points were measured using a COMPLAB melting- point apparatus. Reactions were monitored by thin-layer chromatography (TLC) carried out on 0.25 mm silica gel plates visualized with UV light.

**General procedure for synthesis of compounds 3(a-x) :** Isatin (1.0 mmol.) and isatoic anhydride (1.0 mmol.) were combined with 10ml distilled water in a 50ml round bottom flasks equipped with a stir bar.  $\beta$ -cyclodextrin (20 mol%) was added. Reaction was allowed to stir at room temperature for the appropriate amount of time. After completion of reaction reaction mixture was extracted with ethyl acetate. Organic layer was dried over Na<sub>2</sub>SO<sub>4</sub> and concentrated in vacuo to give crude product which was further purified by column chromatography.

**Catalyst recovery procedure:** After completion of reaction, reaction mixture was extracted with ethyl acetate. Aqueous layer was left overnight at temperature of 5<sup>o</sup>C. Due to its low solubility  $\beta$ -CD precipitated at lower temperature. Cyclodextrin precipitated filtered off, dried and reused for next batch as such.

### **Analytical Data:**

#### **Indolo[2,1-*b*]quinazoline-6,12-dione<sup>1</sup> ( 3a)**

yellow solid; mp >250<sup>o</sup>C; Found C, 72.52, H, 3.19, N, 11.22 C<sub>15</sub>H<sub>8</sub>N<sub>2</sub>O<sub>2</sub> requires C, 72.58, H, 3.25, N, 11.28 %;  $\nu_{\max}$ (KBr): 3062, 1721, 1645, 1435, 1256, 804, 747 cm<sup>-1</sup>; <sup>1</sup>H NMR (300 MHz CDCl<sub>3</sub>)  $\delta$ = 8.61 (d, 1H,  $J$ = 3.4 Hz ), 8.44 (d, 1H,  $J$ = 1.17 Hz), 8.06 (d, 1H,  $J$ = 8.01 Hz), 7.94-7.80 (m, 3H), 7.69 (t, 1H,  $J$ = 7.08 Hz), 7.28 (t, 1H,  $J$ = 7.44 Hz); <sup>13</sup>C NMR (75 MHz CDCl<sub>3</sub>)  $\delta$ =117.5, 120.6, 125.4, 126.3, 127.1, 129.7, 130.0, 133.2, 134.6, 145.3, 146.6, 160.4, 183.8; ESIMS: m/z 249 (M+H).

#### **2-Bromoindolo[2,1-*b*]quinazoline-6,12-dione<sup>2</sup> ( 3b)**

Light yellow solid; mp >250<sup>o</sup>C Found C, 54.98, H, 2.13 N, 8.48 C<sub>15</sub>H<sub>7</sub>BrN<sub>2</sub>O<sub>2</sub> requires C, 55.07; H, 2.16; N, 8.56%;  $\nu_{\max}$ (KBr):3124, 1724, 1647, 1440, 1255, 812, 746 cm<sup>-1</sup>. <sup>1</sup>H NMR (300 MHz CDCl<sub>3</sub>)  $\delta$ = 8.24 (s, 1H), 8.10-8.02 (m, 2H), 7.98-7.82 (m, 2H), 7.63 (t, 1H,  $J$ = 7.2 Hz), 7.38 (t, 1H,  $J$ = 6.4 Hz ); <sup>13</sup>C NMR (75 MHz CDCl<sub>3</sub>)  $\delta$ = 117.8, 120.7, 123.0, 123.5, 125.7, 129.4, 129.2, 129.9, 132.3, 134.8, 136.2, 146.4, 160.8, 182.5; ESIMS: m/z 249 (M+H).

#### **2-Nitroindolo[2,1-*b*]quinazoline-6,12-dione<sup>2</sup> ( 3c)**

Brown solid; mp >250<sup>o</sup>C Found C, 61.25, H, 2.26 N, 14.46 C<sub>15</sub>H<sub>7</sub>N<sub>3</sub>O<sub>4</sub>, requires C, 61.44; H, 2.41; N, 14.33%;  $\nu_{\max}$ (KBr):3062, 1720, 1650, 1532, 1352, 1254, 747, 687cm<sup>-1</sup>; <sup>1</sup>H NMR (300 MHz CDCl<sub>3</sub>)  $\delta$ = 8.51 (s, 1H),

8.34 (d, 1H,  $J= 5.14$  Hz), 8.14-7.98 (m, 2H), 7.94-7.77 (m, 2H), 7.36 (t, 1H,  $J= 6.8$  Hz),  $^{13}\text{C}$  NMR (75 MHz  $\text{CDCl}_3$ )  $\delta= 116.5, 122.4, 123.2, 123.8, 127.2, 128.8, 129.4, 131.4, 134.2, 137.2, 139.4, 161.9, 181.5$ ; ESIMS:  $m/z$  294 (M+H)

### **8-Methoxy-2-nitroindolo[2,1-*b*]quinazoline-6,12-dione<sup>2</sup> (3d)**

Yellow solid; mp  $>250^\circ\text{C}$ ; Found C, 59.27; H, 2.63; N, 13.16  $\text{C}_{16}\text{H}_9\text{N}_3\text{O}_5$ , requires C, 59.45; H, 2.81; N, 13.00;  $\nu_{\text{max}}(\text{KBr})$ : 3108, 2971, 1724, 1675, 1455, 1212,  $\text{cm}^{-1}$ ;  $^1\text{H}$  NMR (300 MHz  $\text{CDCl}_3$ )  $\delta= 8.32$  (d, 1H,  $J= 7.14$  Hz), 8.22 (s, 1H); 8.04-7.91 (m, 2H) 7.84 (d, 1H,  $J= 6.4$  Hz), 7.67 (d, 1H,  $J= 8.7$  Hz), 3.91 (s, 3H);  $^{13}\text{C}$  NMR (75 MHz  $\text{CDCl}_3$ )  $\delta= 50.3, 115.9, 117.4, 123.6, 125.2, 128.1, 128.8, 131.2, 132.8, 133.6, 140.7, 145.8, 153.2, 163.4, 193.6$ ; ESIMS:  $m/z$  324 (M+H).

### **2-Aminoindolo[2,1-*b*]quinazoline-6,12-dione<sup>2</sup> (3e)**

Brown solid; mp  $>250^\circ\text{C}$  Found C, 68.40; H, 3.41; N, 15.85  $\text{C}_{15}\text{H}_9\text{N}_3\text{O}_2$  requires C, 68.44; H, 3.45; N, 15.96%.  $\nu_{\text{max}}(\text{KBr})$ : 3354, 3045, 1722, 1652, 1448, 1265, 804,  $\text{cm}^{-1}$ ;  $^1\text{H}$  NMR (300 MHz  $\text{CDCl}_3$ )  $\delta= 8.32$  (d, 1H,  $J= 6.44$  Hz), 8.21-8.14 (m, 2H), 7.90 (s, 1H), 7.38 (t, 1H,  $J= 7.4$  Hz), 7.24-7.16 (m, 2H), 6.14 (brs, 2H);  $^{13}\text{C}$  NMR (75 MHz  $\text{CDCl}_3$ )  $\delta= 113.2, 118.4, 119.7, 121.6, 123.5, 125.7, 129.8, 130.2, 133.7, 134.5, 145.2, 151.6, 160.6, 182.8$ ; ESIMS:  $m/z$  264 (M+H).

### **8-Bromoindolo[2,1-*b*]quinazoline-6,12-dione<sup>2</sup> (3f)**

Light brown solid; mp  $>250^\circ\text{C}$  Found C, 54.98; H, 2.05; N, 8.42  $\text{C}_{15}\text{H}_7\text{BrN}_2\text{O}_2$  requires C, 55.07; H, 2.16; N, 8.56%.  $\nu_{\text{max}}(\text{KBr})$ : 3068, 1724, 1656, 1446, 1265,  $\text{cm}^{-1}$ ;  $^1\text{H}$  NMR (300 MHz  $\text{CDCl}_3$ )  $\delta= 8.59$ -8.48 (m, 2H), 7.98 (d, 1H,  $J= 7.12$  Hz), 7.84 (d, 1H,  $J= 6.4$  Hz), 7.81-7.74 (m, 2H), 7.64-7.58 (m, 1H);  $^{13}\text{C}$  NMR (75 MHz  $\text{CDCl}_3$ )  $\delta= 118.3, 120.8, 122.5, 125.6, 126.9, 129.3, 132.0, 133.9, 134.4, 141.3, 143.5, 148.6, 153.7, 160.6, 189.4$ ; ESIMS:  $m/z$  324 (M+H).

### **8-Methoxyindolo[2,1-*b*]quinazoline-6,12-dione (3g)**

Yellow solid; mp  $>250^\circ\text{C}$ ; Found C, 68.88; H, 3.43; N, 10.20  $\text{C}_{16}\text{H}_{10}\text{N}_2\text{O}_3$  requires C, 69.06; H, 3.62; N, 10.07%;  $^1\text{H}$  NMR (300 MHz  $\text{CDCl}_3$ )  $\delta= 8.03$  (1 H, d,  $J= 6.24$  Hz), 7.70-7.63 (2 H, m) 7.62 (d, 1H,  $J= 5.4$  Hz), 7.55 (s, 1H), 7.50-7.44 (m, 2H), 3.84 (s, 3H);  $^{13}\text{C}$  NMR (75 MHz  $\text{CDCl}_3$ )  $\delta= 54.8, 104.6, 111.4, 118.8, 126.1, 126.6, 127.1, 127.8, 132.4, 146.3, 147.5, 153.8, 160.6, 184.2$ ;  $\nu_{\text{max}}(\text{KBr})$ : 3058, 2972, 1719, 1645, 1465, 1252,  $\text{cm}^{-1}$ . ESIMS:  $m/z$  324 (M+H)..

### **8-Methylindolo[2,1-*b*]quinazoline-6,12-dione<sup>2</sup> (3h)**

Yellow solid; mp  $>250^\circ\text{C}$ ; Found C, 73.20; H, 3.76; N, 10.54  $\text{C}_{16}\text{H}_{10}\text{N}_2\text{O}_2$  requires C, 73.27; H, 3.84; N, 10.68%;  $\nu_{\text{max}}(\text{KBr})$ : 3075, 2968, 1722, 1653, 1448, 1262, 687  $\text{cm}^{-1}$ ;  $^1\text{H}$  NMR (300 MHz  $\text{CDCl}_3$ )  $\delta= 8.03$ -8.7.94 (m, 2H), 7.68 (s, 1H), 7.57 (d, 1H,  $J= 6.21$  Hz), 7.42 (d, 1H,  $J= 7.6$  Hz), 7.28-7.14 (m, 2H), 2.31 (s, 3H);  $^{13}\text{C}$  NMR (75 MHz  $\text{CDCl}_3$ )  $\delta= 21.3, 113.7, 120.8, 124.1, 125.2, 126.8, 127.4, 144.4, 144.8, 145.2, 150.7, 161.2, 183.7$ ; ESIMS:  $m/z$  263 (M+H).

**8-Chloroindolo[2,1-*b*]quinazoline-6,12-dione<sup>2</sup> ( 3i)**

Yellow solid; mp >250<sup>0</sup>C; Found C, 63.65; H, 2.42; N, 9.86 C<sub>15</sub>H<sub>7</sub>ClN<sub>2</sub>O<sub>2</sub> requires C, 63.73; H, 2.50; N, 9.91%  
v<sub>max</sub>(KBr):3078, 2974, 1720, 1658, 1456, 1250, cm<sup>-1</sup>; <sup>1</sup>H NMR (300 MHz CDCl<sub>3</sub>) δ= 8.62 (d, 1H, *J*= 6.8 Hz), 8.44 (d, 1H, *J*= 5.8 Hz), 8.06 (d, 1H, *J*= 7.15 Hz), 7.90-7.88 (m, 2H), 7.76-7.68 (m, 2H); <sup>13</sup>C NMR (75 MHz CDCl<sub>3</sub>) δ= 116.5, 121.8, 123.5, 127.6, 127.9, 128.3, 130.0, 133.9, 134.4, 141.3, 146.5, 148.6, 152.7, 161.6, 188.4; ESIMS: m/z 263 (M+H).

**8-Nitroindolo[2,1-*b*]quinazoline-6,12-dione<sup>2</sup> ( 3j)**

Pale yellow solid; mp >250<sup>0</sup>C; Found C, 61.36; H, 2.32; N, 14.26 C<sub>15</sub>H<sub>7</sub>N<sub>3</sub>O<sub>4</sub> requires C, 61.44; H, 2.41; N, 14.33%; v<sub>max</sub>(KBr):3064, 1720, 1665, 1453, 1255, 804, 746 cm<sup>-1</sup>; <sup>1</sup>H NMR (300 MHz CDCl<sub>3</sub>) δ= 8.74-8.72 (m, 2H), 8.54(s, 1H), 8.39 (d, 1H, *J*= 6.0), 7.79 (d, 2H, *J*= 3.14 Hz), 7.77-7.74 (m, 1H); <sup>13</sup>C NMR (75 MHz CDCl<sub>3</sub>) δ= 115.0, 120.0, 120.8, 123.8, 126.6, 127.3, 133.4, 145.5, 147.1, 153.9, 160.6, 186.4; ESIMS: m/z 293 (M+H).

**8-Fluoroindolo[2,1-*b*]quinazoline-6,12-dione ( 3k)**

Creamish white solid; mp >250<sup>0</sup>C; Found C, 67.62; H, 2.58; N, 10.46 C<sub>15</sub>H<sub>7</sub>FN<sub>2</sub>O<sub>2</sub>, requires C, 67.67; H, 2.65; N, 10.52; v<sub>max</sub>(KBr):3075, 1719, 1656, 1459, 1253, 804, cm<sup>-1</sup>; <sup>1</sup>H NMR (300 MHz CDCl<sub>3</sub>) δ= 8.48-8.21(m, 2H), 7.92-7.89(m, 1H), 7.86 (t, 1H, *J*= 6.4 Hz), 7.69-7.58(m, 2H), 7.43 (t, 1H, *J*= 5.3 Hz), 8.03 (d, 1H, *J*= 8.15 Hz), 7.81-7.94 (m, 2H), 7.79-7.71 (m, 2H); <sup>13</sup>C NMR (75 MHz CDCl<sub>3</sub>) δ= 108.6, 111.3, 118.8, 127.3, 128.6, 128.7, 129.3, 135.4, 145.8, 146.5, 162.2, 183.4; ESIMS: m/z 266 (M+H).

**8-Iodoindolo[2,1-*b*]quinazoline-6,12-dione ( 3l)**

Creamish solid; mp >250<sup>0</sup>C Found C, 48.07; H, 1.68; N, 7.36 C<sub>15</sub>H<sub>7</sub>IN<sub>2</sub>O<sub>2</sub> requires C, 48.15; H, 1.89; N, 7.49%; v<sub>max</sub>(KBr): 3068, 1724, 1656, 1446, 1265, cm<sup>-1</sup>; <sup>1</sup>H NMR (300 MHz CDCl<sub>3</sub>) δ= 8.67-8.54 (m, 2H), 8.05 (d, 1H, *J*= 5.27 Hz), 7.95 (d, 1H, *J*= 6.2 Hz), 7.81-7.76 (2H, m), 7.70-7.63(m, 1H); <sup>13</sup>C NMR (75 MHz CDCl<sub>3</sub>) δ= 112.0, 124.6, 125.4, 126.4, 127.9, 128.3, 131.2, 134.4, 134.8, 147.8, 149.6, 155.8, 161.3, 183.5; ESIMS: m/z 374 (M+H).

**8-Bromo-2,3-dimethoxyindolo[2,1-*b*]quinazoline-6,12-dione (3m)**

Yellow solid; mp >250<sup>0</sup>C; Found C, 52.48; H, 2.64; N, 7.31 C<sub>17</sub>H<sub>11</sub>BrN<sub>2</sub>O<sub>4</sub> requires C, 52.74; H, 2.86; N, 7.24%; v<sub>max</sub>(KBr): 3074, 2875, 1728, 1646, 1446, 1245 cm<sup>-1</sup>; <sup>1</sup>H NMR (300 MHz CDCl<sub>3</sub>) δ= 8.54 (s, 1H), 8.41 (s, 1H), 8.20(d, 1 H, *J*= 6.4 Hz); 7.89-7.68(m, 2H); 3.98(s, 6H); <sup>13</sup>C NMR (75 MHz CDCl<sub>3</sub>) δ= 48.04, 108.2, 110.5, 116.6, 118.4, 121.32, 123.4, 135.7, 137.2, 139.8, 143.0, 146.6, 162.9, 163.9, 188.3; ESIMS: m/z 388 (M+H).

**8-Bromo-2-nitroindolo[2,1-*b*]quinazoline-6,12-dione (3n)**

Pale yellow solid; mp >250<sup>0</sup>C ; Found C, 48.20; H, 1.44; N, 11.41 C<sub>15</sub>H<sub>6</sub>BrN<sub>3</sub>O<sub>4</sub> requires C, 48.41; H, 1.63; N, 11.29%; v<sub>max</sub>(KBr): 3064, 1720, 1665, 1453, 1255, 804, 746 cm<sup>-1</sup>; <sup>1</sup>H NMR (300 MHz CDCl<sub>3</sub>) δ= 8.38 (d, 1H, *J*= 8.1 Hz), 8.21(s, 1H), 8.09 (s, 1H), 8.03-7.88 (m, 2H), 7.79 (d, 1H, *J*= 7.14 Hz); <sup>13</sup>C NMR (75 MHz CDCl<sub>3</sub>) δ=

119.4, 121.2, 121.9, 124.8, 126.5, 128.3, 133.3, 138.5, 142.0, 145.7, 153.2, 161.1, 164.8, 194.02; ESIMS: m/z 373 (M+H).

**2-Amino-8-bromoindolo[2,1-*b*]quinazoline-6,12-dione (3o)**

Yellow solid; mp >250°C; Found C, 52.34; H, 2.15; N, 12.38 C<sub>15</sub>H<sub>8</sub>BrN<sub>3</sub>O<sub>2</sub> requires C, 52.66; H, 2.36; N, 12.28;  $\nu_{\max}$ (KBr): 3078, 2984, 1724, 1656, 1444, 1250, cm<sup>-1</sup>; <sup>1</sup>H NMR (300 MHz CDCl<sub>3</sub>)  $\delta$ = 8.58 (d, 1H, *J*= 6.9 Hz), 8.42 (d, 1H, *J*= 5.8 Hz), 8.02 (s, 1H); 7.98 (d, 1H, *J*= 7.15 Hz); 7.89-7.77 (m, 2H); 5.51 (brs, 2H); <sup>13</sup>C NMR (75 MHz CDCl<sub>3</sub>)  $\delta$ = 118.9, 119.2, 120.4, 121.2, 121.8, 122.6, 124.9, 137.4, 139.2, 140.5, 149.6, 164.3, 168.0, 189.1; ESIMS: m/z 343 (M+H).

**2-Bromo-8-nitroindolo[2,1-*b*]quinazoline-6,12-dione (3p)**

Yellow solid; mp >250°C ; Found C, 48.28; H, 1.51; N, 11.34 C<sub>15</sub>H<sub>6</sub>BrN<sub>3</sub>O<sub>4</sub> requires C, 48.41; H, 1.63; N, 11.29%.  $\nu_{\max}$ (KBr): 3082, 2862, 1724, 1658, 1442, 1248, cm<sup>-1</sup>; <sup>1</sup>H NMR (300 MHz CDCl<sub>3</sub>)  $\delta$ = 8.46 (d, 1H, *J*= 7.4 Hz), 8.31(s, 1H); 8.13-7.92(m, 2H), 7.82(d, 1H, *J*= 6.13 Hz), 7.68 (d, 1H, *J*= 7.16 Hz); <sup>13</sup>C NMR (75 MHz CDCl<sub>3</sub>)  $\delta$ = 118.6, 121.4, 122.3, 122.9, 124.03, 128.1, 134.9, 138.5, 143.6, 145.8, 152.2, 160.3, 165.9, 191.4; ESIMS: m/z 373 (M+H),

**2,3-Dimethoxy-8-nitroindolo[2,1-*b*]quinazoline-6,12-dione (3q)**

Yellow solid; mp >250°C; Found C, 57.58; H, 2.98; N, 11.96 C<sub>17</sub>H<sub>11</sub>N<sub>3</sub>O<sub>6</sub> requires C, 57.80; H, 3.14; N, 11.89%;  $\nu_{\max}$ (KBr): 3064, 2878, 1721, 1686, 1456, 1205 cm<sup>-1</sup>. <sup>1</sup>H NMR (300 MHz CDCl<sub>3</sub>)  $\delta$ = 8.25 (s, 1H), 8.14 (s, 1H), 8.04(d, 1H, *J*= 6.4 Hz); 7.88-7.80 (m, 2H); 3.94 (s, 6H); <sup>13</sup>C NMR (75 MHz CDCl<sub>3</sub>)  $\delta$ = 51.04, 106.2, 112.5, 114.06, 117.4, 120.32, 124.4, 132.7, 134.2, 138.8, 140.0, 143.6, 160.9, 165.3, 192.03; ESIMS: m/z 354 (M+H).

**2-Chloro-8-nitroindolo [2,1-*b*]quinazoline-6,12-dione (3r)**

Yellow solid; mp >250°C ; Found C, 54.79; H, 1.81; N, 12.94 C<sub>15</sub>H<sub>6</sub>ClN<sub>3</sub>O<sub>4</sub> requires C, 54.98; H, 1.85; N, 12.82.  $\nu_{\max}$ (KBr): 3052, 2872, 1721, 1648, 1462, 1208, cm<sup>-1</sup>; <sup>1</sup>H NMR (300 MHz CDCl<sub>3</sub>)  $\delta$ = 8.52 (d, 1H, *J*= 6.9 Hz), 8.40 (s, 1H); 8.04-7.88 (m, 2H), 7.76 (d, 1H, *J*= 6.13 Hz), 7.52 (d, 1H, *J*= 7.16 Hz); <sup>13</sup>C NMR (75 MHz CDCl<sub>3</sub>)  $\delta$ = 117.3, 122.6, 123.8, 124.2, 124.9, 126.3, 132.9, 138.4, 139.6, 144.4, 152.5, 162.6, 164.8, 192.2; ESIMS: m/z 328 (M+H).

**8-Chloro-2-nitroindolo[2,1-*b*]quinazoline-6,12-dione (3s)**

Yellow solid; mp >250°C ; Found C, 54.81; H, 1.68; N, 12.89 C<sub>15</sub>H<sub>6</sub>ClN<sub>3</sub>O<sub>4</sub> requires C, 54.98; H, 1.85; N, 12.82;  $\nu_{\max}$ (KBr): 3058, 2965, 1724, 1656, 1452, 1216, cm<sup>-1</sup>; <sup>1</sup>H NMR (300 MHz CDCl<sub>3</sub>)  $\delta$ = 8.51 (s, 1H); 8.30 (d, 1H, *J*= 8.1 Hz), 8.12 (d, 1H, *J*= 7.3 Hz), 7.81-7.68 (m., 3H); <sup>13</sup>C NMR (75 MHz CDCl<sub>3</sub>)  $\delta$ = 118.6, 121.2, 123.7, 124.3, 125.1, 131.2.6, 131.7, 138.8, 140.9, 143.8, 153.5, 161.7, 165.2, 193.02 ; ESIMS: m/z 328 (M+H).

**8-Chloro-2,3-dimethoxyindolo[2,1-*b*]quinazoline-6,12-dione (3t)**

Yellow solid; mp >250°C; Found C, 59.36; H, 3.08; N, 8.29 C<sub>17</sub>H<sub>11</sub>ClN<sub>2</sub>O<sub>4</sub> requires C, 59.57; H, 3.23; N, 8.17;  $\nu_{\max}$ (KBr): 3054, 2862, 1725, 1656, 1441, 1225 cm<sup>-1</sup>; <sup>1</sup>H NMR (300 MHz CDCl<sub>3</sub>)  $\delta$ = 8.41 (s, 1H), 8.29 (s, 1H), 8.14 (d, 1H, *J*= 8.3 Hz); 7.91-7.79 (m, 2H); 3.86 (s, 6H); <sup>13</sup>C NMR (75 MHz CDCl<sub>3</sub>)  $\delta$ = 51.604, 111.4, 113.2, 115.1, 117.3, 121.0, 121.7, 133.9, 138.2, 141.3, 143.2, 148.1, 162.0, 164.8, 193.3; ESIMS: m/z 388 (M+H).

### 2-Chloro-8-fluoroindolo[2,1-*b*]quinazoline-6,12-dione (3u)

Yellow solid; mp >250°C ; Found C, 59.79; H, 1.88; N, 9.48 C<sub>15</sub>H<sub>6</sub>ClFN<sub>2</sub>O<sub>2</sub>, requires C, 59.92; H, 2.01; N, 9.32;  $\nu_{\max}$ (KBr): 3061, 2945, 1728, 1652, 1450, 1218, cm<sup>-1</sup>; <sup>1</sup>H NMR (300 MHz CDCl<sub>3</sub>)  $\delta$ = 8.63 (d, 1H, *J*= 7.1 Hz), 8.51 (s, 1H); 8.38 (d, 1H, *J*= 6.7 Hz), 8.28-8.14 (m, 2H), 8.04 (d, 1H, *J*= 7.4 Hz) ; <sup>13</sup>C NMR (75 MHz CDCl<sub>3</sub>)  $\delta$ = 116.8, 119.2, 122.4, 122.8, 124.6; 128.4, 136.7, 138.2, 143.9, 147.6, 156.9, 163.4, 166.8, 196.2; ESIMS: m/z 301 (M+H),

### 8-Fluoro-2-nitroindolo[2,1-*b*]quinazoline-6,12-dione (3v)

Yellow solid; mp >250°C ; Found C, 57.71; H, 1.80; N, 13.64 . C<sub>15</sub>H<sub>6</sub>FN<sub>3</sub>O<sub>4</sub>, requires C, 57.89; H, 1.94; N, 13.50;  $\nu_{\max}$ (KBr): 3108, 2975, 1724, 1636, 1440, 12039 cm<sup>-1</sup>; <sup>1</sup>H NMR (300 MHz CDCl<sub>3</sub>)  $\delta$ = 8.46 (s, 1H); 8.34 (d, 1H, *J*= 7.6 Hz), 8.14 (d, 1H, *J*= 8.4 Hz), 7.98-7.85 (m, 2H), 7.74 (d, 1H, *J*= 7.9 Hz); <sup>13</sup>C NMR (75 MHz CDCl<sub>3</sub>)  $\delta$ = 119.4, 120.8, 123.9, 124.3, 126.1, 126.6, 132.7, 137.4, 141.9, 144.2, 154.5, 163.1, 165.8, 195.0 ; ESIMS: m/z 311 (M+H).

### 2-Chloro-8-methoxyindolo[2,1-*b*]quinazoline-6,12-dione (3w)

Yellow solid; mp >250°C; Found C, 61.59; H, 2.98; N, 8.81 C<sub>16</sub>H<sub>9</sub>ClN<sub>2</sub>O<sub>3</sub>, requires C, 61.45; H, 2.90; N, 8.96;  $\nu_{\max}$ (KBr): 3218, 2872, 1721, 1665, 1445, 1232, cm<sup>-1</sup>; <sup>1</sup>H NMR (300 MHz CDCl<sub>3</sub>)  $\delta$ = 8.28 (d, 1H, *J*= 6.24 Hz), 8.02 (s, 1H); 7.91-7.84 (m, 2H) 7.68 (d, 1H, *J*= 5.4 Hz), 7.52 (d, 1H, *J*= 6.8 Hz), 3.68 (s, 3H); <sup>13</sup>C NMR (75 MHz CDCl<sub>3</sub>)  $\delta$ = 53.4, 116.3, 118.1, 124.8, 126.2, 127.1, 128.8, 131.6, 142.7, 147.8, 153.2, 162.1, 190.2; ESIMS: m/z 313 (M+H),

### 8-Methoxy-2-nitroindolo[2,1-*b*]quinazoline-6,12-dione (3x)

Yellow solid; mp >250°C; Found C, 59.27; H, 2.63; N, 13.16 C<sub>16</sub>H<sub>9</sub>N<sub>3</sub>O<sub>5</sub>, requires C, 59.45; H, 2.81; N, 13.00;  $\nu_{\max}$ (KBr): 3108, 2971, 1724, 1675, 1455, 1212, cm<sup>-1</sup>; <sup>1</sup>H NMR (300 MHz CDCl<sub>3</sub>)  $\delta$ = 8.32 (d, 1H, *J*= 7.14 Hz), 8.22 (s, 1H); 8.04-7.91 (m, 2H) 7.84 (d, 1H, *J*= 6.4 Hz), 7.67 (d, 1H, *J*= 8.7 Hz), 3.91 (s, 3H); <sup>13</sup>C NMR (75 MHz CDCl<sub>3</sub>)  $\delta$ = 50.3, 115.9, 117.4, 123.6, 125.2, 128.1, 128.8, 131.2, 132.8, 133.6, 140.7, 145.8, 153.2, 163.4, 193.6; ESIMS: m/z 324 (M+H).

### Reference:

1. B. Batanero, and F. Barba, *Tetrahedron Lett.* 2006, **47**, 8201-8203.
2. V. M. Sharma, P. Prasanna, K. V. Adi Seshu, B. Renuka, C. V. Laxman Rao, G. Sunil Kumar, C. Prasad Narasimhulu, P. Aravind Babu, R. C. Puranik, D. Subramanyam, A. Venkateswarlu, S. Rajagopal, K. B. Sunil Kumar, C. S. Rao, N. V. S. Rao Mamidi, D. S. Deevi, R. Ajaykumarb and R. Rajagopalanb, *Bioorg. Med. Chem. Lett.*, 2002, **12**, 2303-2307
3. S.-T. Yu, J.-W. Chern, T.-M. Chen, Y.-F. Chiu, H.-T. Chen and Y.-H. Chen, *Acta Pharmacologica Sinica*, 2010, **31**, 259-264.

3g)

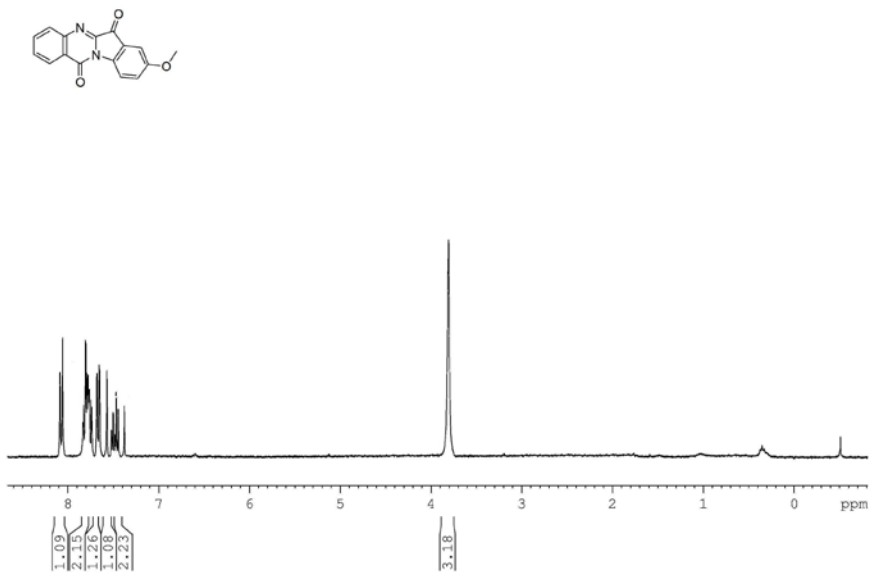

3g)

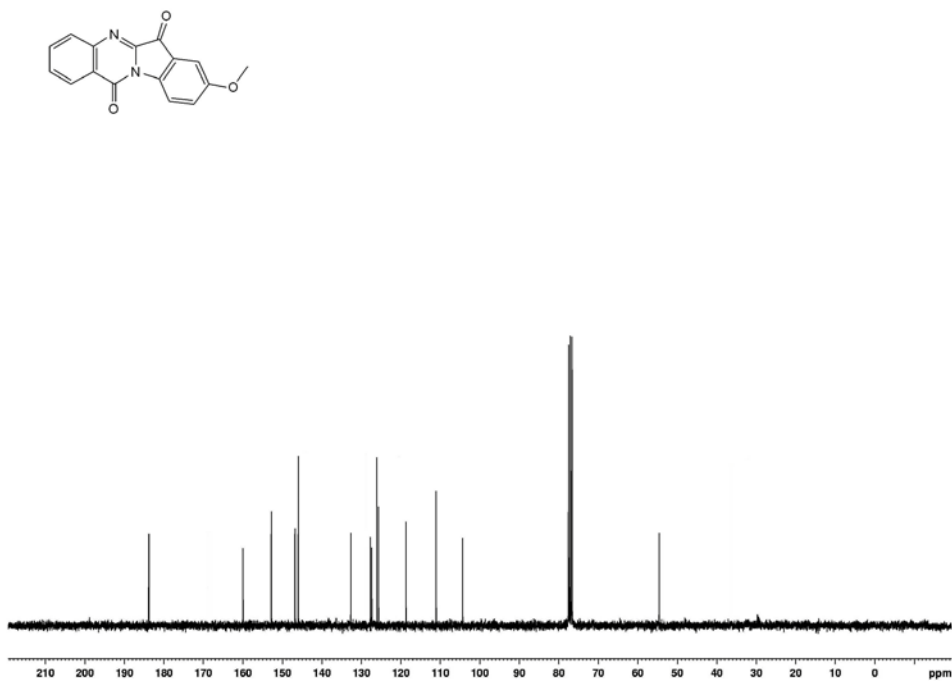

3k)

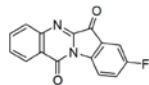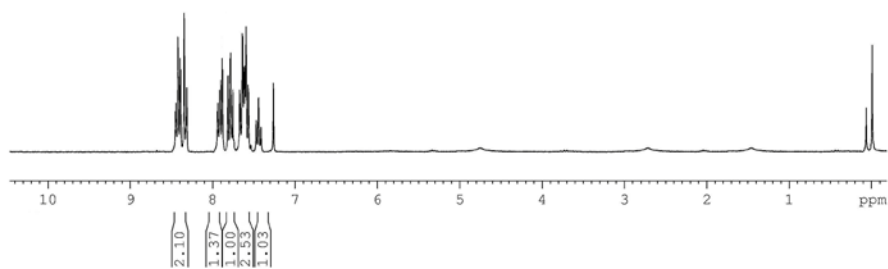

3k)

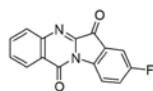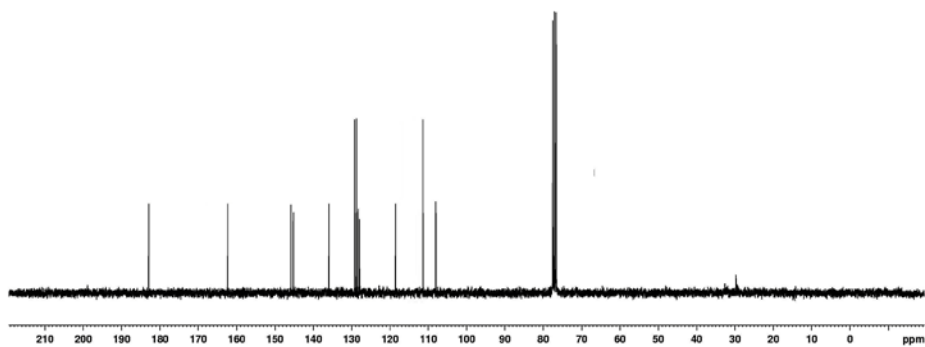



3m)

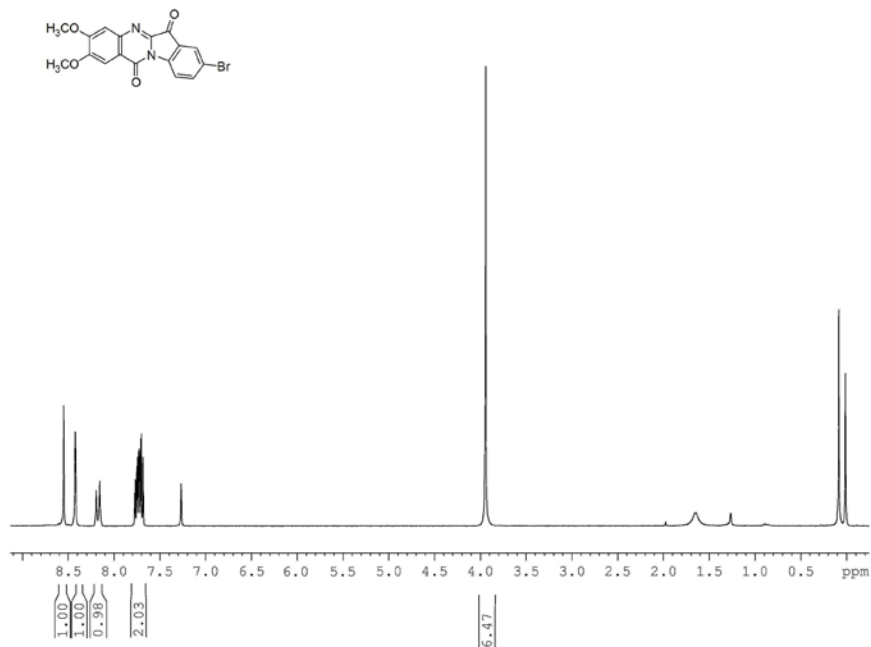

3m)

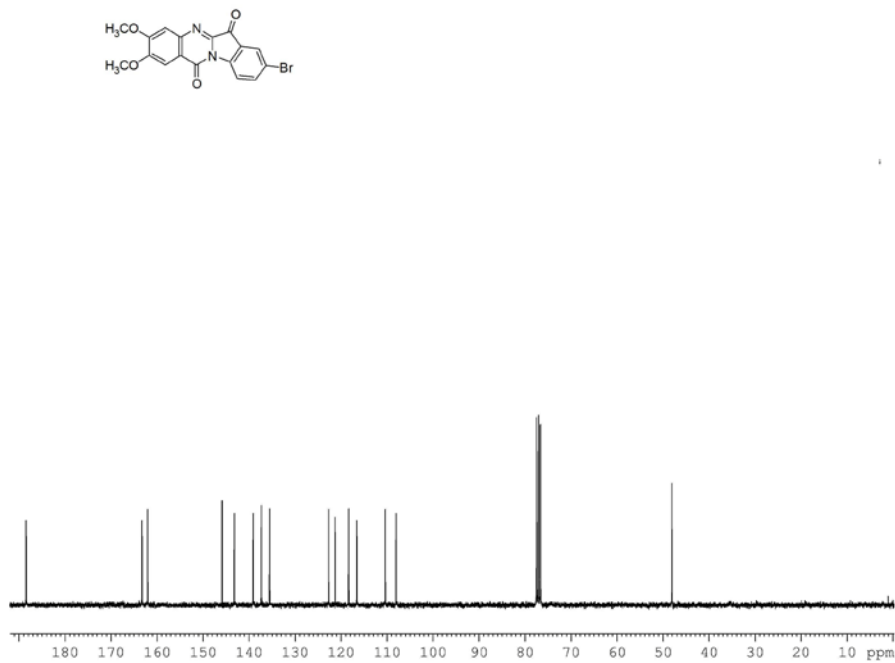

3n)

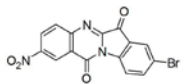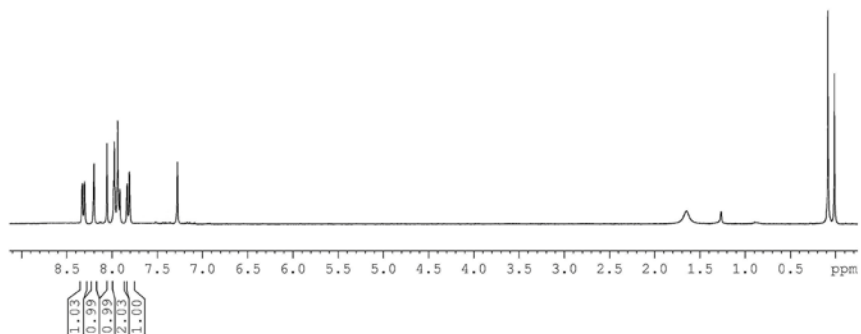

3n)

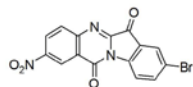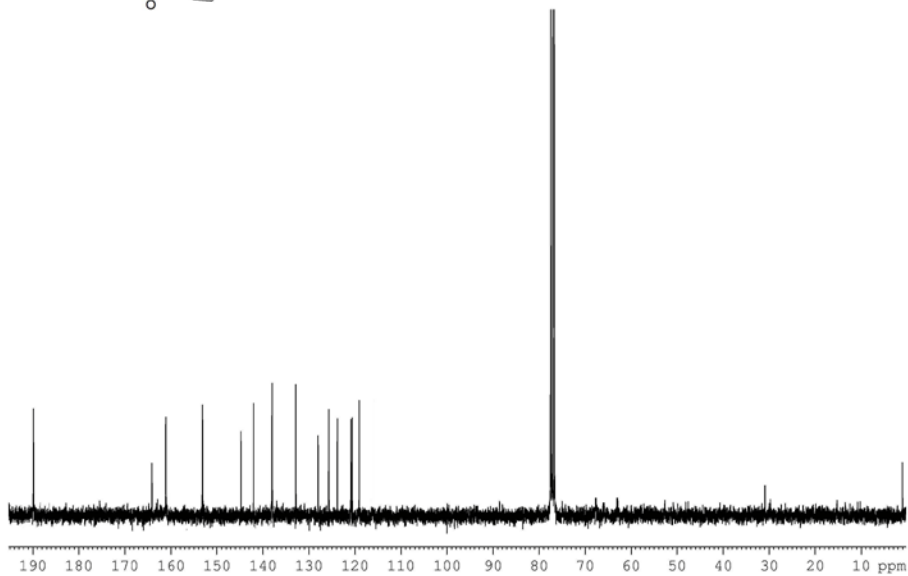

3o)

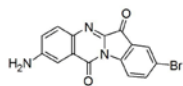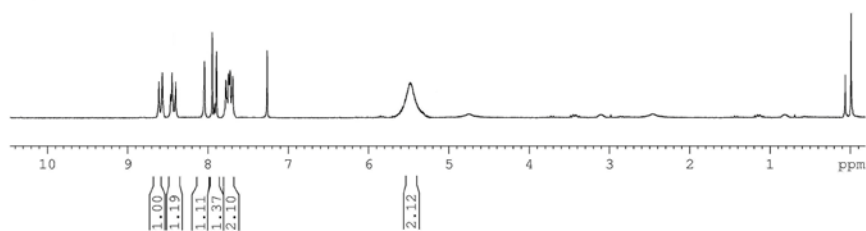

3o)

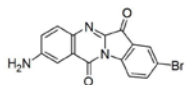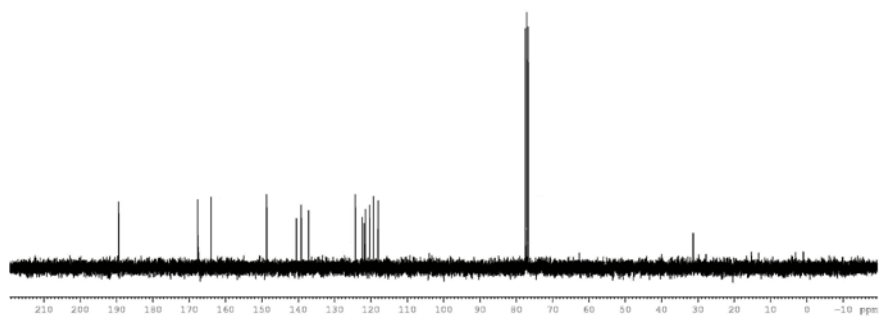

3p)

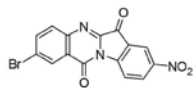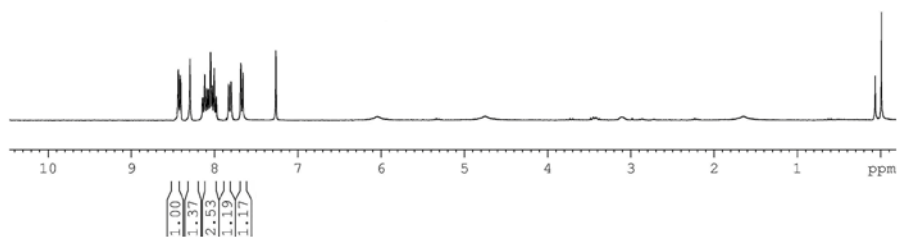

3p)

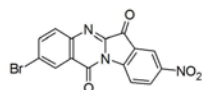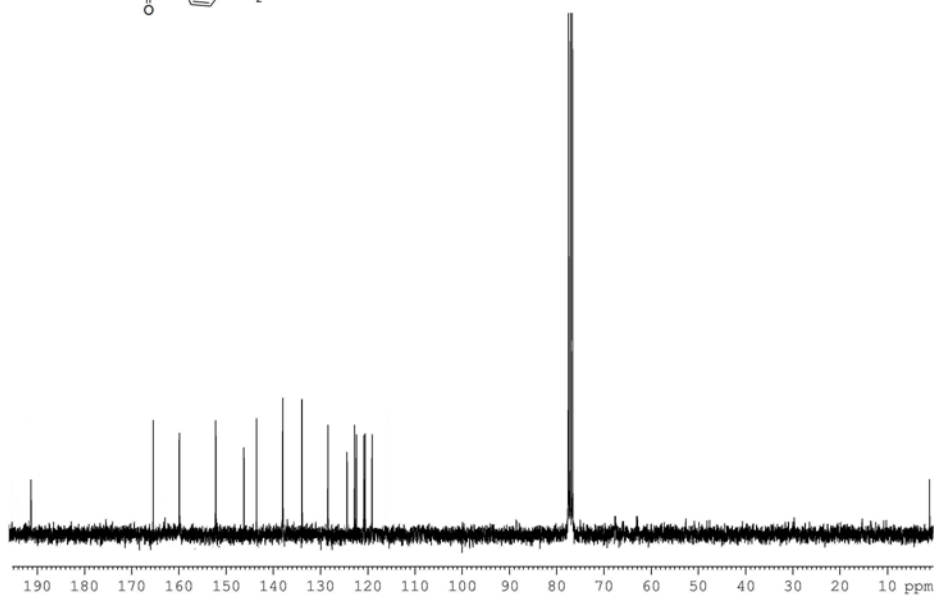

3q)

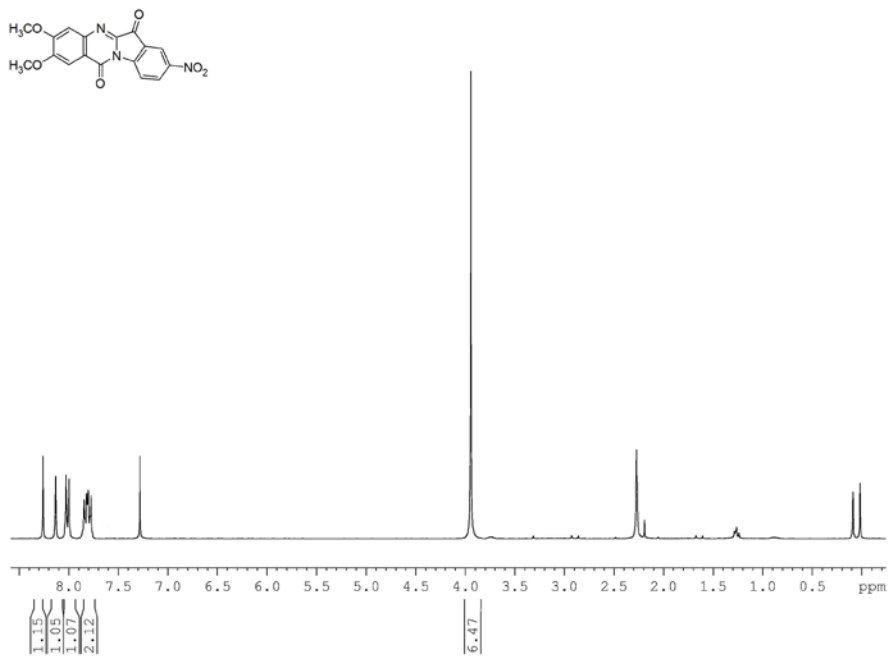

3q)

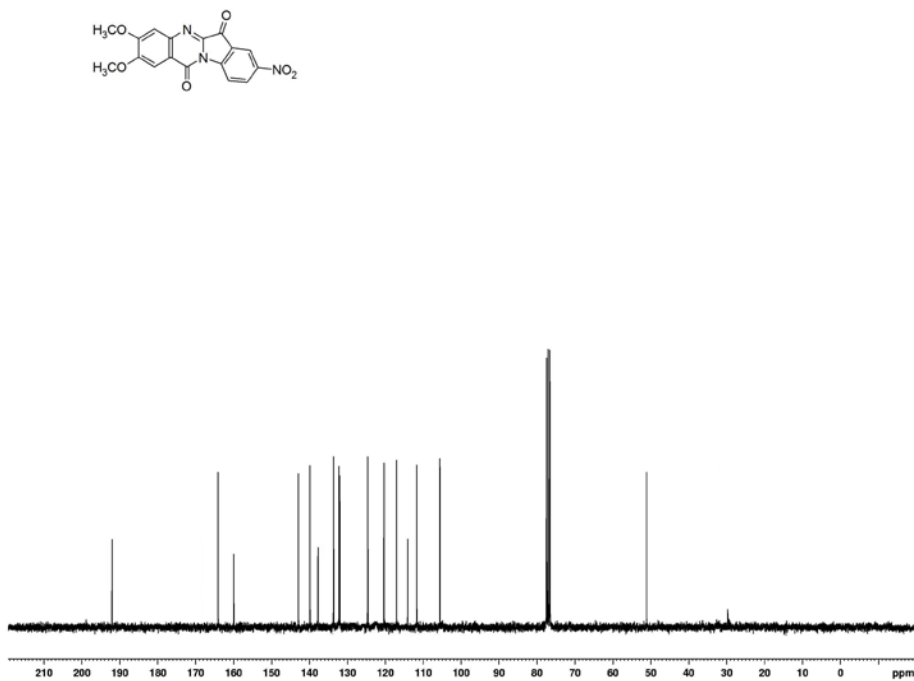

3r)

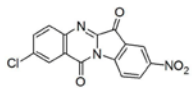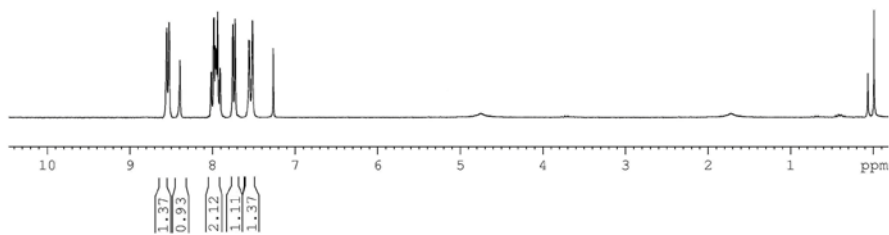

3r)

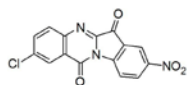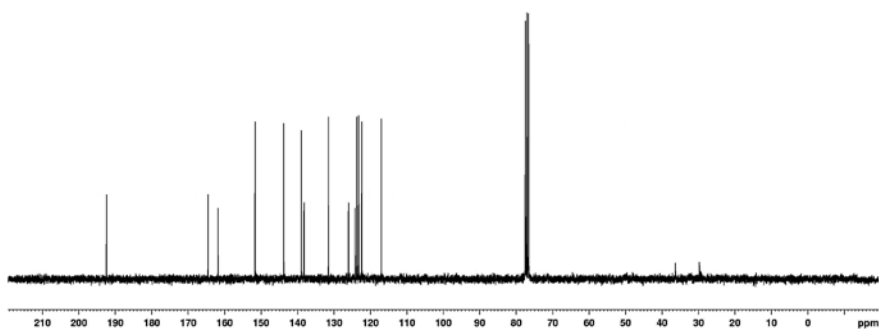

3s)

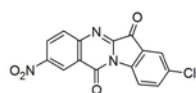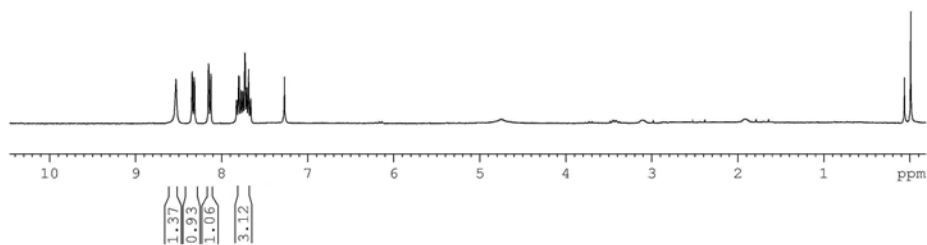

3s)

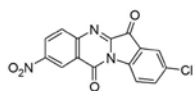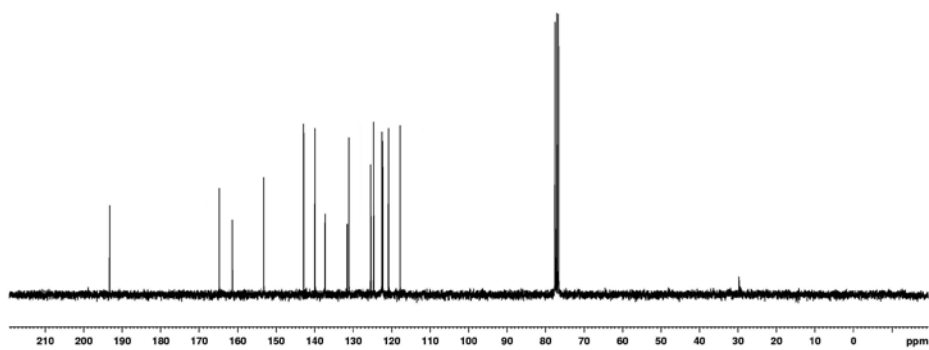

3t)

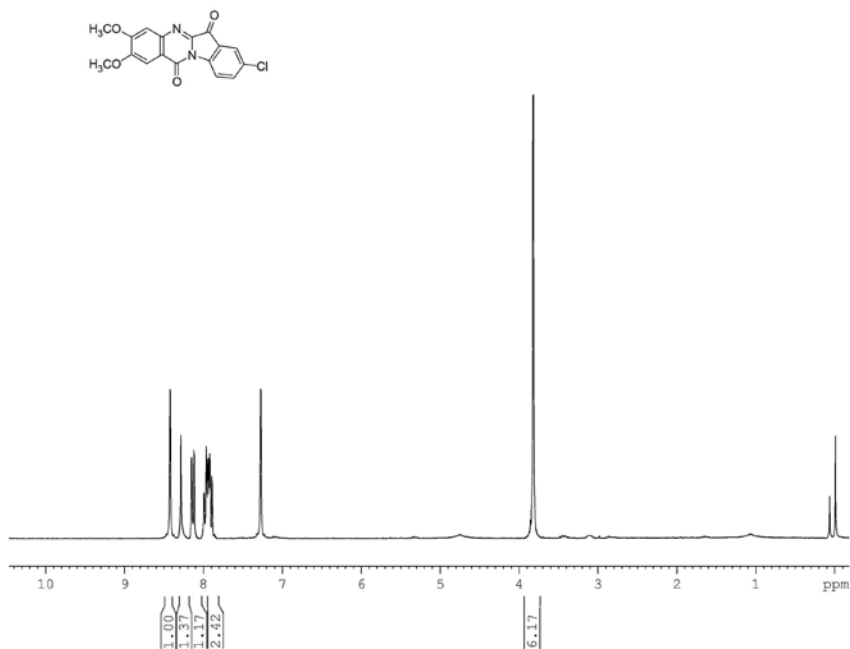

3t)

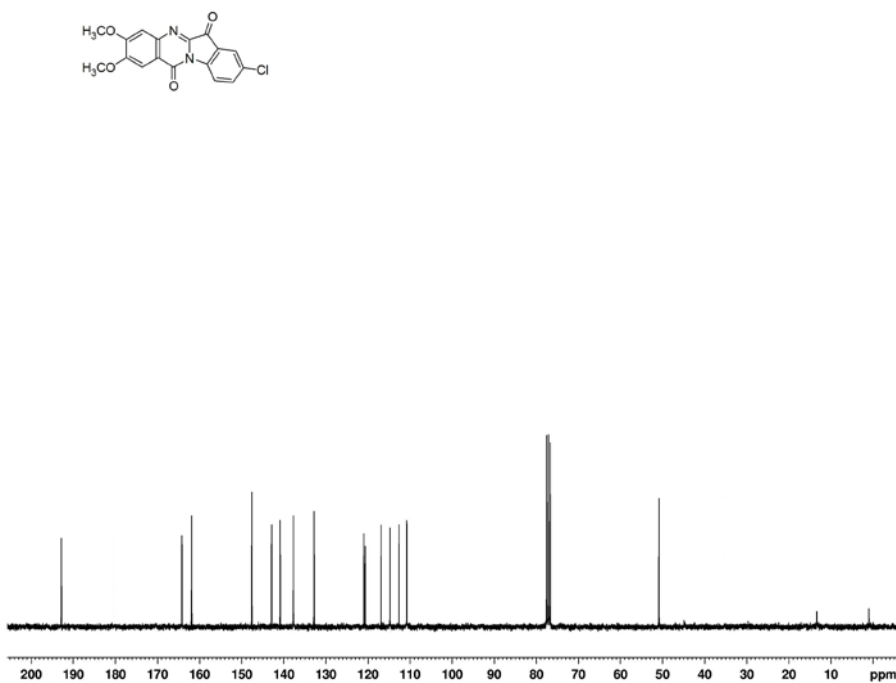



3u)

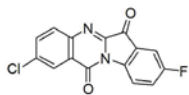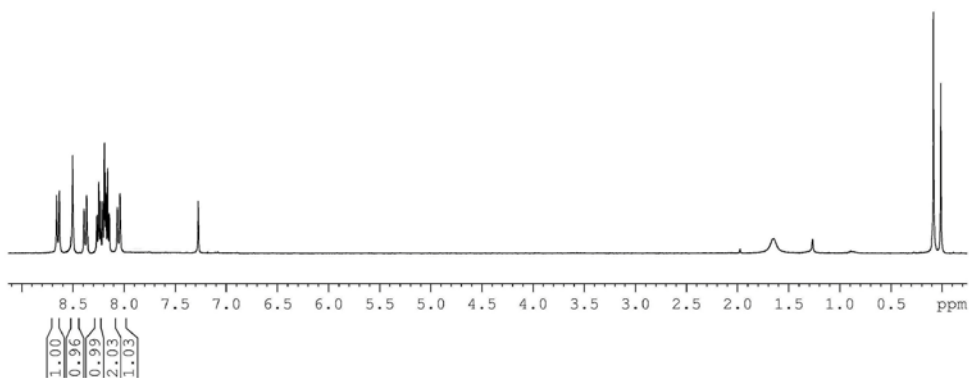

3u)

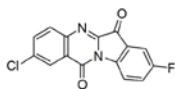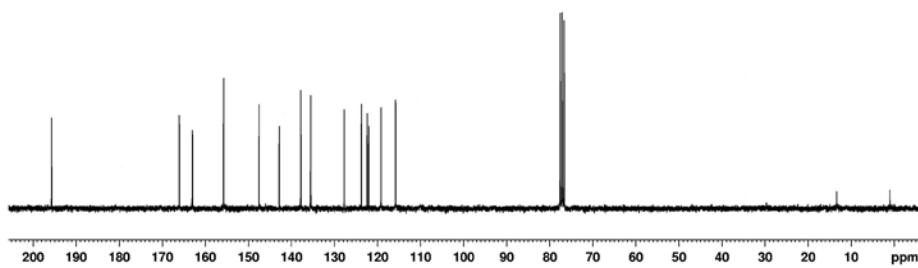

Supplement: c0gc00523a.pdf [file c0gc00523a.pdf]
